# Supplementary material for: Genome-wide scan identifies novel genetic loci regulating salivary metabolite levels
Source: PubMed Central journal article supplement (PMC7104674; doi:10.1093/hmg/ddz308), 2020-01-21

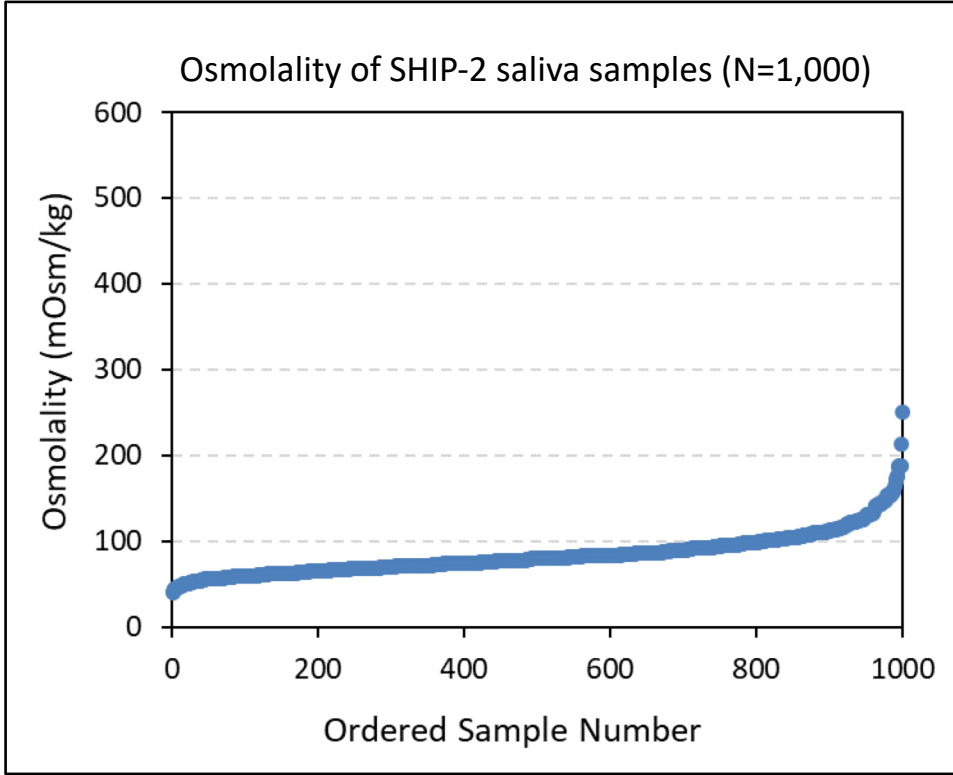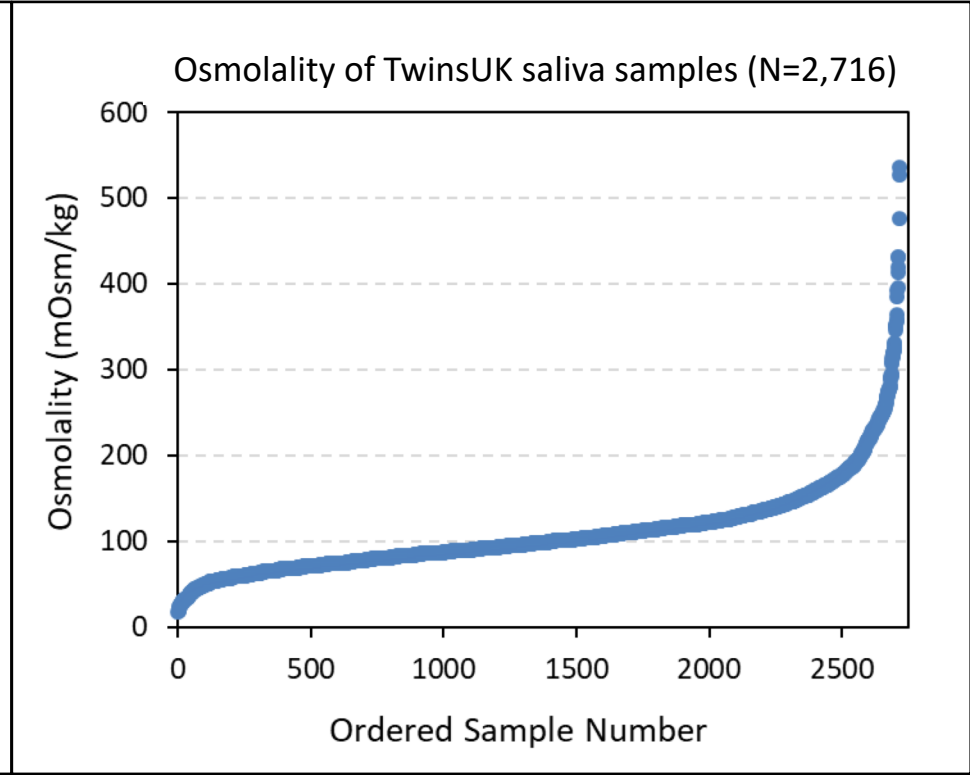

Supplement: figures5_ddz308.pdf [file figures5_ddz308.pdf]
